# Supplementary material for: Discriminating protein tags on a dsDNA construct using a Dual Nanopore Device
Source: PubMed Central journal article supplement (PMC9253098; doi:10.1038/s41598-022-14609-9), 2022-07-04
Supplement: 41598_2022_14609_MOESM5_ESM.pdf [file 41598_2022_14609_MOESM5_ESM.pdf]

# Supplementary Material for “Discriminating protein tags on a dsDNA construct using a Dual Nanopore Device”

Swarnadeep Seth<sup>1</sup>, Arthur Rand<sup>4</sup>, Walter Reisner<sup>2</sup>, William B. Dunbar<sup>4</sup>, Robert Sladek<sup>3</sup>, and Aniket Bhattacharya<sup>1</sup>

<sup>1</sup>Department of Physics, University of Central Florida, Orlando, Florida 32816-2385, USA

<sup>2</sup>Department of Physics, McGill University, 3600 rue university, Montreal, Quebec H3A 2T8, Canada

<sup>3</sup>Departments of Medicine & Human Genetics, McGill University, Montreal, H3A 0G1, Canada and

<sup>4</sup>Nooma Bio, 250 Natural Bridge Dr, Santa Cruz, CA 95060, USA

## V. SPHERICAL TAGS AND SIDECHAINS COMPARISON

We compare the cumulative dwell time distributions of the seven spherical tags and the sidechain tags. The spherical tag is heavier in mass ( $6m$ ) and carries a charge  $3q$ . On contrary, the sidechains are of length  $l_{tag} = 6\sigma$  with each of the sidechain beads is of mass  $m$  and carries a charge  $0.5q$ . Fig. S1 ((a)/(b)) show the dwell time distributions of the  $L \rightarrow R/R \rightarrow L$  scans for the spherical tags and Fig. S1 ((c)/(d)) shows the same for the sidechains. We observe that both the spherical and sidechain tags produce asymmetry in the dwell time. For the  $R \rightarrow L$  scans the dwell time asymmetry is more prominent for the sidechains which matches closer to the experiment.

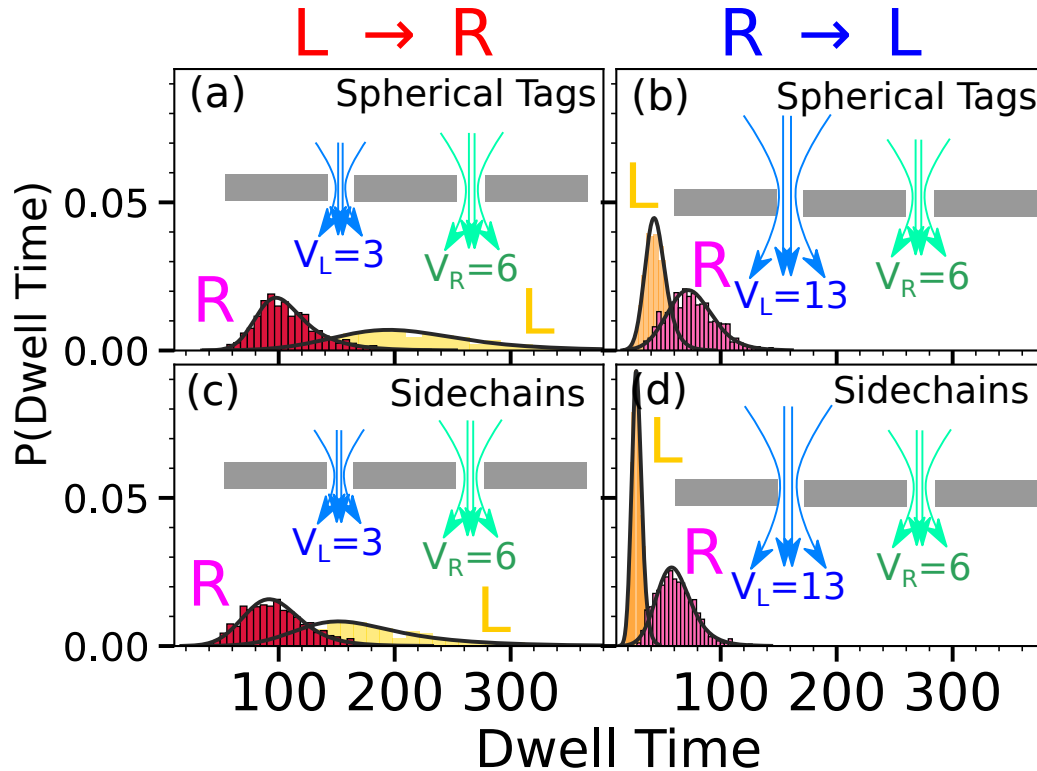

FIG. S1. Cumulative dwell time distributions (a)  $L \rightarrow R$  and (b)  $R \rightarrow L$  scans for the seven charged ( $3q$ ) spherical tags with heavier mass ( $6m$ ). The next row represent the cumulative dwell time distributions for (c)  $L \rightarrow R$  and (d)  $R \rightarrow L$  scans for the charged ( $q_{tag} = 0.5q$ ) sidechain tags of length ( $l_{tag} = 6\sigma$ ) For the both cases, for  $L \rightarrow R$  translocations left pore voltage is  $V_L = 3$  and right pore voltage is  $V_R = 6$  while for the  $R \rightarrow L$  translocations  $V_L = 13$  and  $V_R = 6$ . The yellow/red and the orange/magenta dwell time histograms are obtained from the left/right pore in  $L \rightarrow R$  and  $R \rightarrow L$  directions respectively. Schematics of the electrostatic forces on the DNA in the left/right pore are shown by the blue/green arrows (not to scale). The black envelopes represent the exponentially modified Gaussian distribution fit of the dwell time histograms.
