# Supplementary material for: Discriminating protein tags on a dsDNA construct using a Dual Nanopore Device
Source: PubMed Central journal article supplement (PMC9253098; doi:10.1038/s41598-022-14609-9), 2022-07-04
Supplement: 41598_2022_14609_MOESM7_ESM.pdf [file 41598_2022_14609_MOESM7_ESM.pdf]

# Supplementary Material for “Discriminating protein tags on a dsDNA construct using a Dual Nanopore Device”

Swarnadeep Seth<sup>1</sup>, Arthur Rand<sup>4</sup>, Walter Reisner<sup>2</sup>, William B. Dunbar<sup>4</sup>, Robert Sladek<sup>3</sup>, and Aniket Bhattacharya<sup>1</sup>

<sup>1</sup>Department of Physics, University of Central Florida, Orlando, Florida 32816-2385, USA

<sup>2</sup>Department of Physics, McGill University, 3600 rue university, Montreal, Quebec H3A 2T8, Canada

<sup>3</sup>Departments of Medicine & Human Genetics, McGill University, Montreal, H3A 0G1, Canada and

<sup>4</sup>Nooma Bio, 250 Natural Bridge Dr, Santa Cruz, CA 95060, USA

## VII. COMPARISON OF EXPERIMENT AND SIMULATION DWELL TIME DISTRIBUTIONS FOR DIFFERENT VOLTAGE BIASES

In the double nanopore experiments [S1–S4] there is an uncertainty in the applied voltage on the left nanopore for the  $R \rightarrow L$  scans. For the  $L \rightarrow R$  scans the left pore voltage is  $V_L = 150$  mV and the right pore voltage is 300 mV, and for the  $R \rightarrow L$  scan the left pore voltage is increased to 600/650 mV while keeping the right pore applied voltage constant at 300 mV. In our Brownian dynamics simulation we have implemented both the voltage conditions, where  $V_L/V_R = 0.5$  for the  $L \rightarrow R$  scans and  $V_L/V_R = 2.0$  shown in Fig. S1(d), and  $V_L/V_R = 2.17$  shown in Fig. S1(f) for the  $R \rightarrow L$  scans. We observe that this voltage variations in the left pore for  $R \rightarrow L$  scans does not affect the distributions qualitatively.

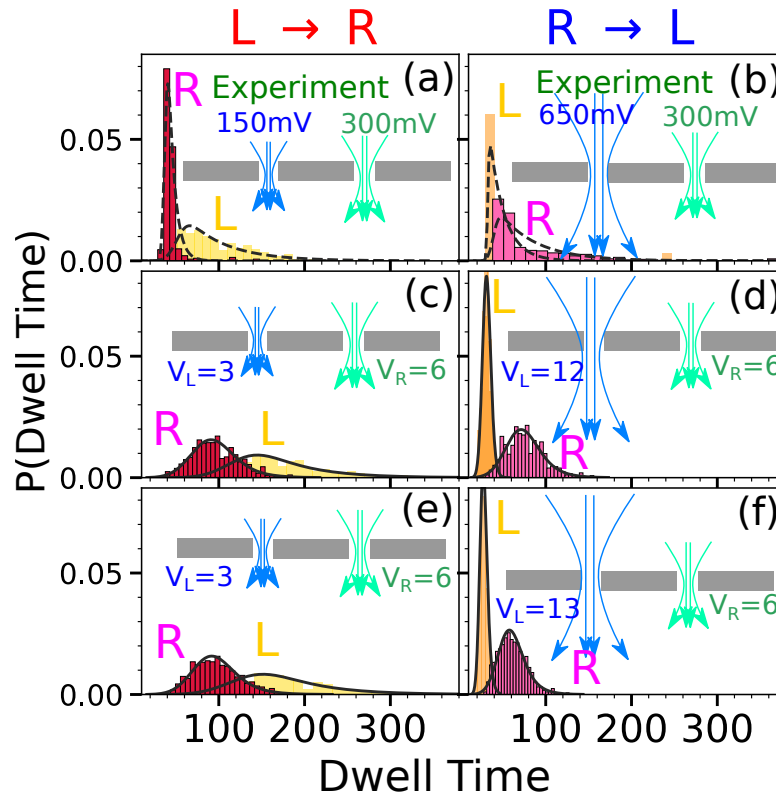

FIG. S1. Cumulative dwell time distributions of the seven tags (sidechains) (a)  $L \rightarrow R$  and (b)  $R \rightarrow L$  (1st row) obtained from the experiment. The next two rows (2nd - 3rd) are simulation dwell time data for different combinations of voltages  $V_L$  and  $V_R$  applied across the left and right nanopore. In the 2nd row, the ratio of the left/right pore voltages for (c)  $L \rightarrow R$  scans is  $V_L/V_R = 0.5$  and 2.0 for the (d)  $R \rightarrow L$  scans. In the 3rd row, the voltage ratio for (e)  $L \rightarrow R$  scans is  $V_L/V_R = 0.5$  and 2.17 for the (f)  $R \rightarrow L$  scans. In each row the yellow/red (left column) and the orange/magenta (right column) dwell time histograms are obtained from the left/right pore in  $L \rightarrow R$  and  $R \rightarrow L$  directions. Schematics of the electrostatic forces on the DNA in the left/right pore are shown by the blue/green arrows (not to scale). The black envelopes represent the exponentially modified Gaussian distribution fit of the dwell time histograms.

- 
- [S1] Zhang, Y., Liu, X., Zhao, Y., Yu, J.-K., Reisner, W. & Dunbar, W. B. Single Molecule DNA Resensing Using a Two-Pore Device. *Small* **14**, 1801890 (2018).
- [S2] Liu, X., Zhang, Y., Nagel, R., Reisner, W. & Dunbar, W. B. Controlling DNA Tug-of-War in a Dual Nanopore Device. *Small* **15**, 1901704 (2019).
- [S3] Liu, X., Zimny, P., Zhang, Y., Rana, A., Nagel, R., Reisner, W. & Dunbar, W. B. Flossing DNA in a Dual Nanopore Device. *Small* **16**, 1905379 (2020).
- [S4] Rand, A., Zimny, P., Nagel, R., Telang, C., Mollison, J., Bruns, A., Leff, E., Reisner, W. W., & Dunbar, W. B. Electronic Mapping of a Bacterial Genome with Dual Solid-State Nanopores and Active Single-Molecule Control. *ACS Nano*, **16**, 5258-5273 (2022).
